# Supplementary material for: Heteroatom-doped porous carbon derived from “all-in-one” precursor sewage sludge for electrochemical energy storage
Source: Royal Society of Chemistry journal article supplement (doi:10.1039/c5ra07178j), 2015-01-01
Supplement: c5ra07178j1.pdf [file c5ra07178j1.pdf]

**Supplementary information for**  
**Heteroatom-doped porous carbon derived from the “all-in-one” precursor**  
**sewage sludge for electrochemical energy storage**

Shi-Jie Yuan, Xiao-Hu Dai\*

State Key Laboratory of Pollution Control and Resource Reuse, College of  
Environmental Science and Engineering, Tongji University, Shanghai, 200092, China

**\*Corresponding author:**

Prof. Xiao-Hu Dai, Phone: +86-21-65986297; Fax: +86-21-65983602; E-mail:

[daixiaohu@tongji.edu.cn](mailto:daixiaohu@tongji.edu.cn)

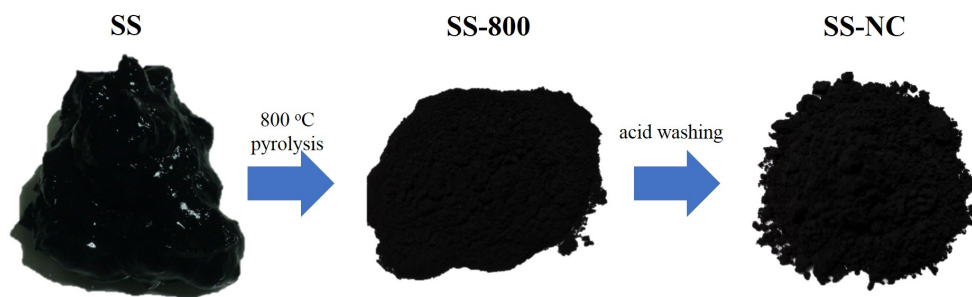

**Figure S1.** The schematic presentation of the synthesis process.

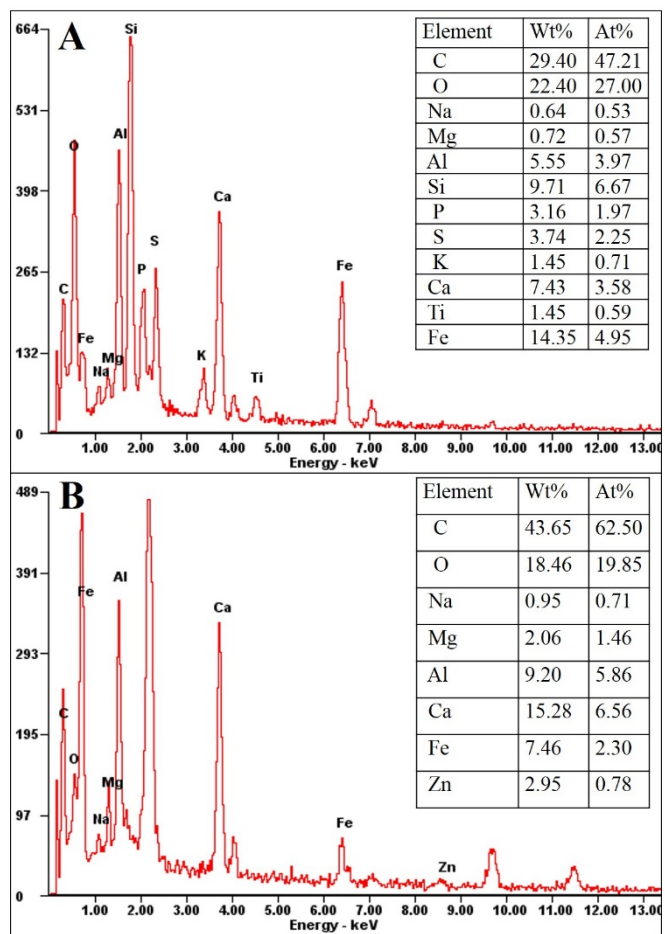

**Figure S2.** Energy dispersive X-ray (EDX) spectra of the (A) SS-800 and (B) SS-NC.

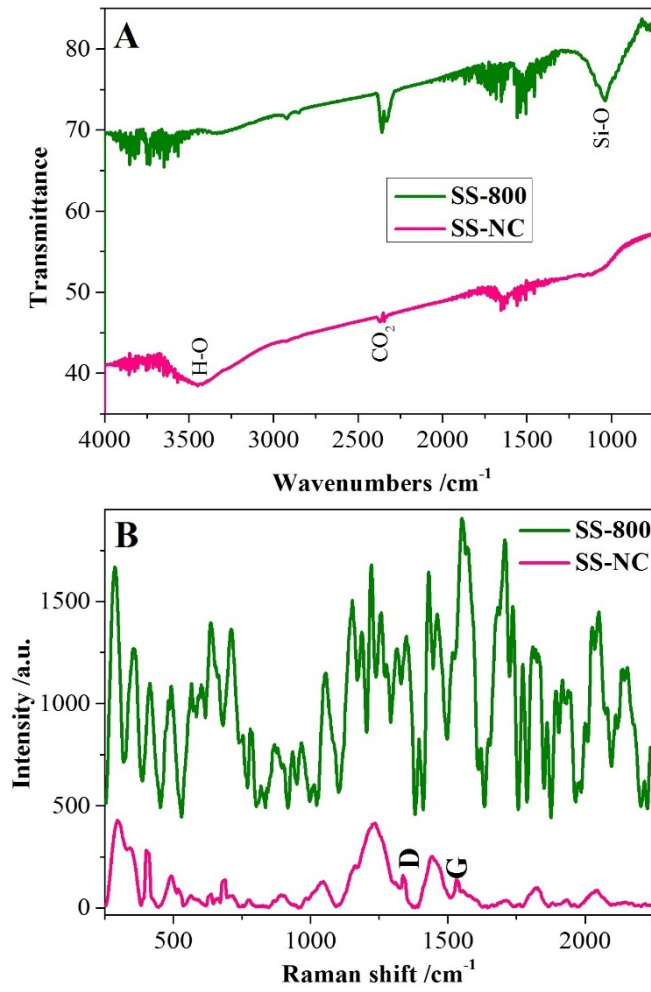

**Figure S3.** Characterization of the SS-800 and SS-NC. (A) FTIR spectra and (B) Raman spectra of the SS-800 and SS-NC.
